# Supplementary material for: BfpI, BfpJ, and BfpK Minor Pilins Are Important for the Function and Biogenesis of Bundle-Forming Pili Expressed by Enteropathogenic Escherichia coli
Source: PubMed Central journal article supplement (PMC4810605; doi:10.1128/jb.00818-15), 2016-02-12

# Supplementary material

## BfpI secondary Structure

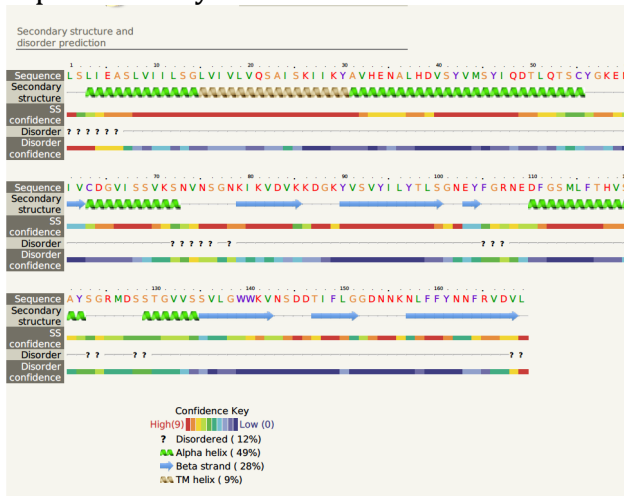

## BfpJ secondary structure

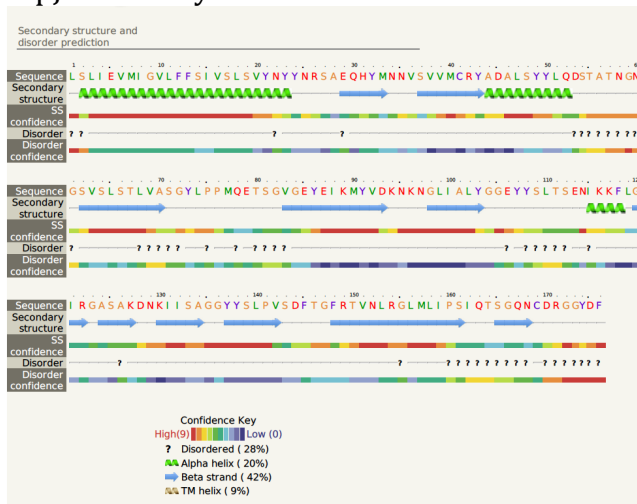

## BfpK secondary structure

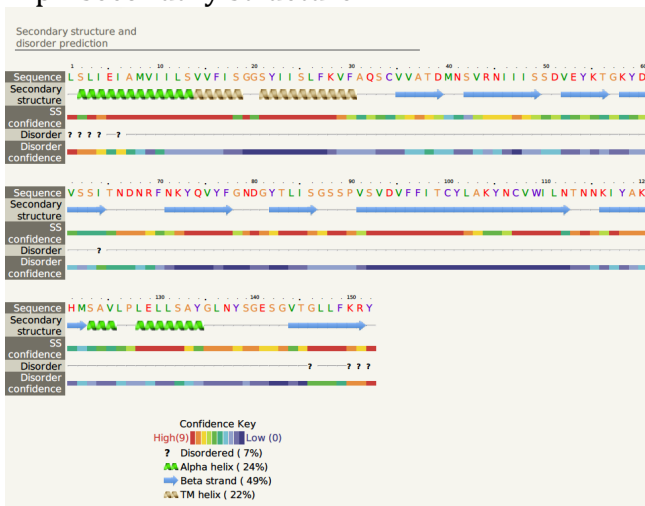

Supplement: JB.00818-15_zjb999093950so1.pdf [file JB.00818-15_zjb999093950so1.pdf]
